# Supplementary material for: Shallow water table effects on water, sediment and pesticidetransport in vegetative filter strips: Part B. model coupling,application, factor importance and uncertainty
Source: Copernicus journal article supplement (doi:10.5194/hess-2017-406), 2017-08-23
Supplement: Supplementary file [file hess-2017-406-AC6-supplement.zip]

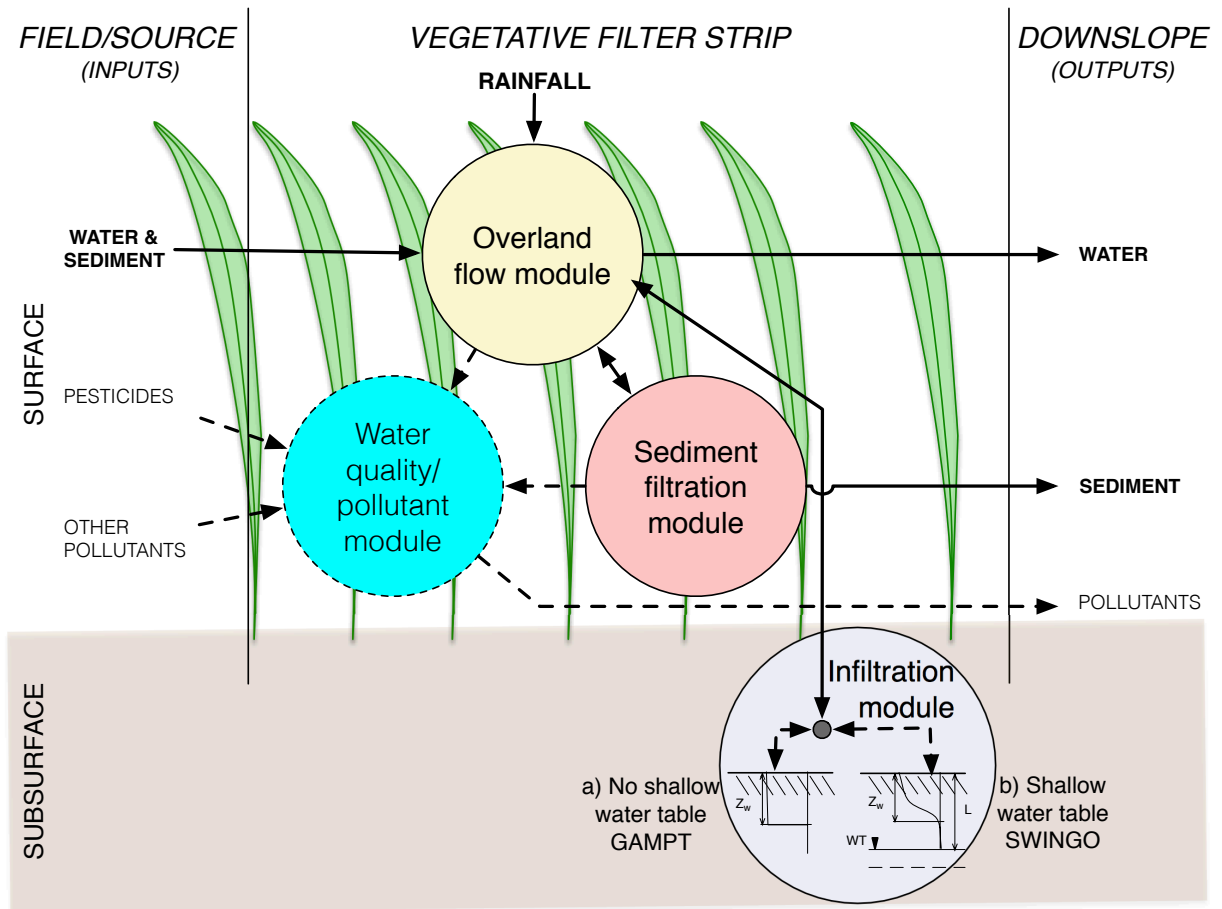

FIG. 1

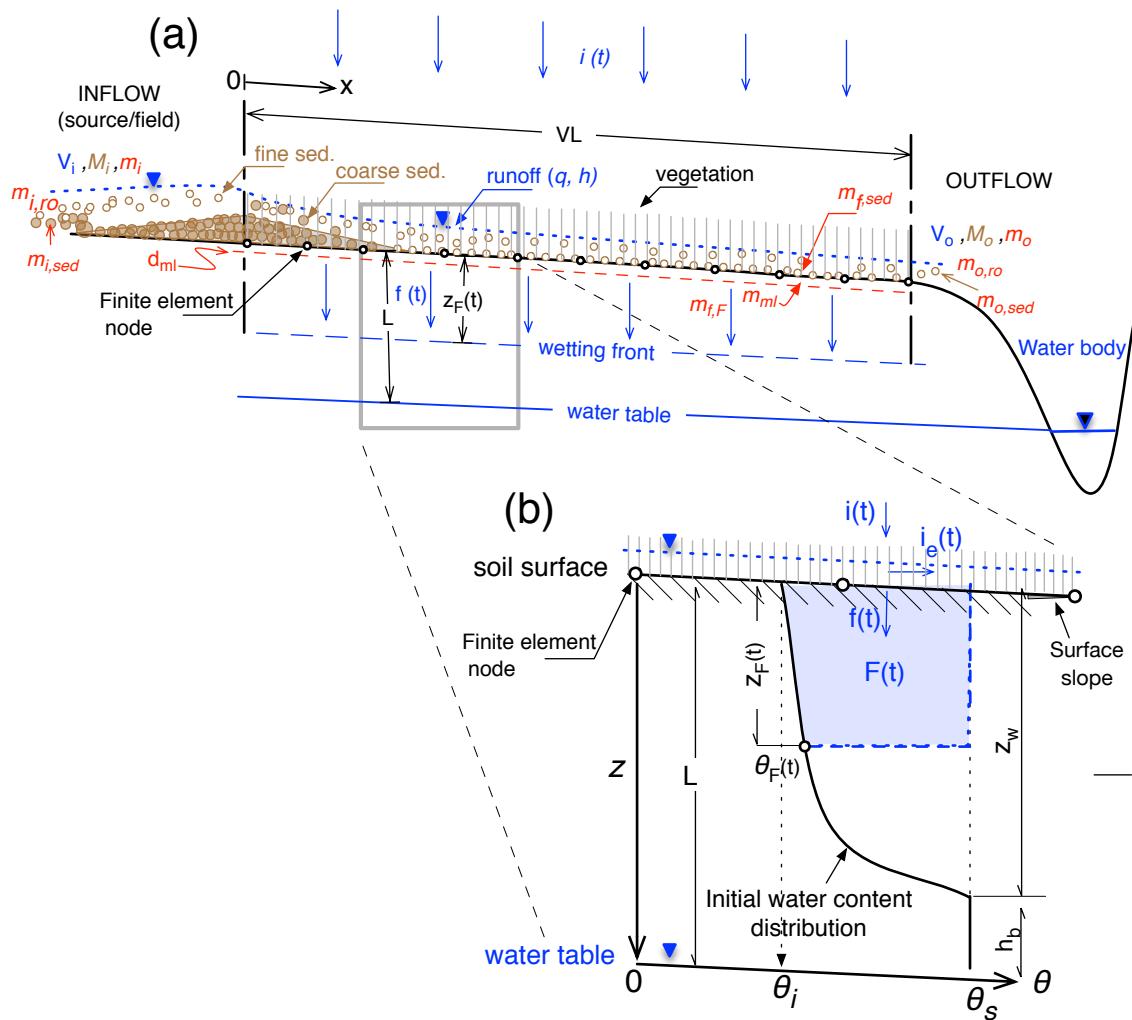

FIG. 2

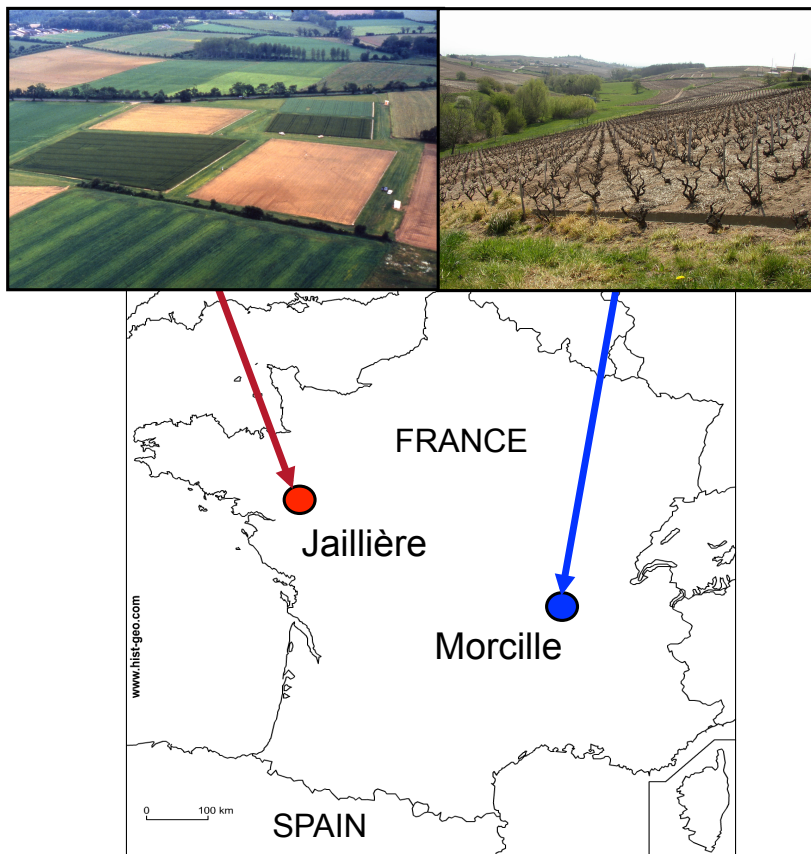

FIG. 3

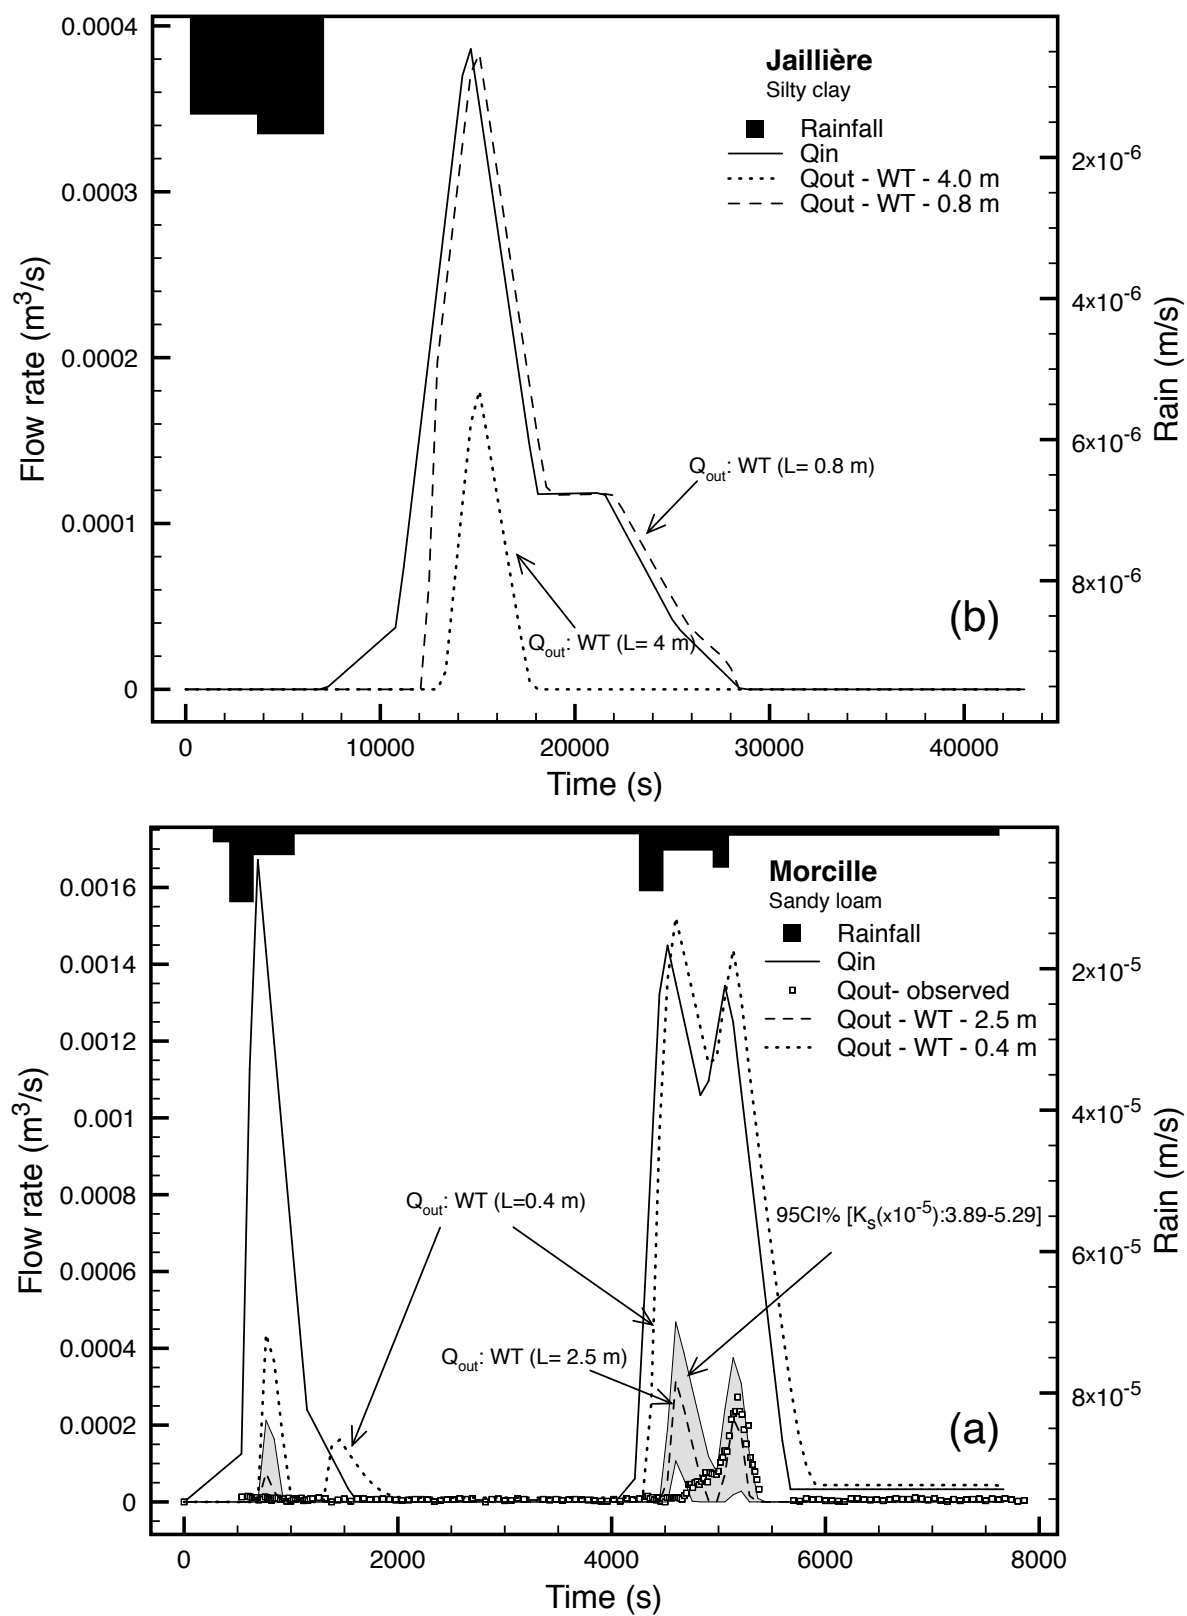

FIG. 4

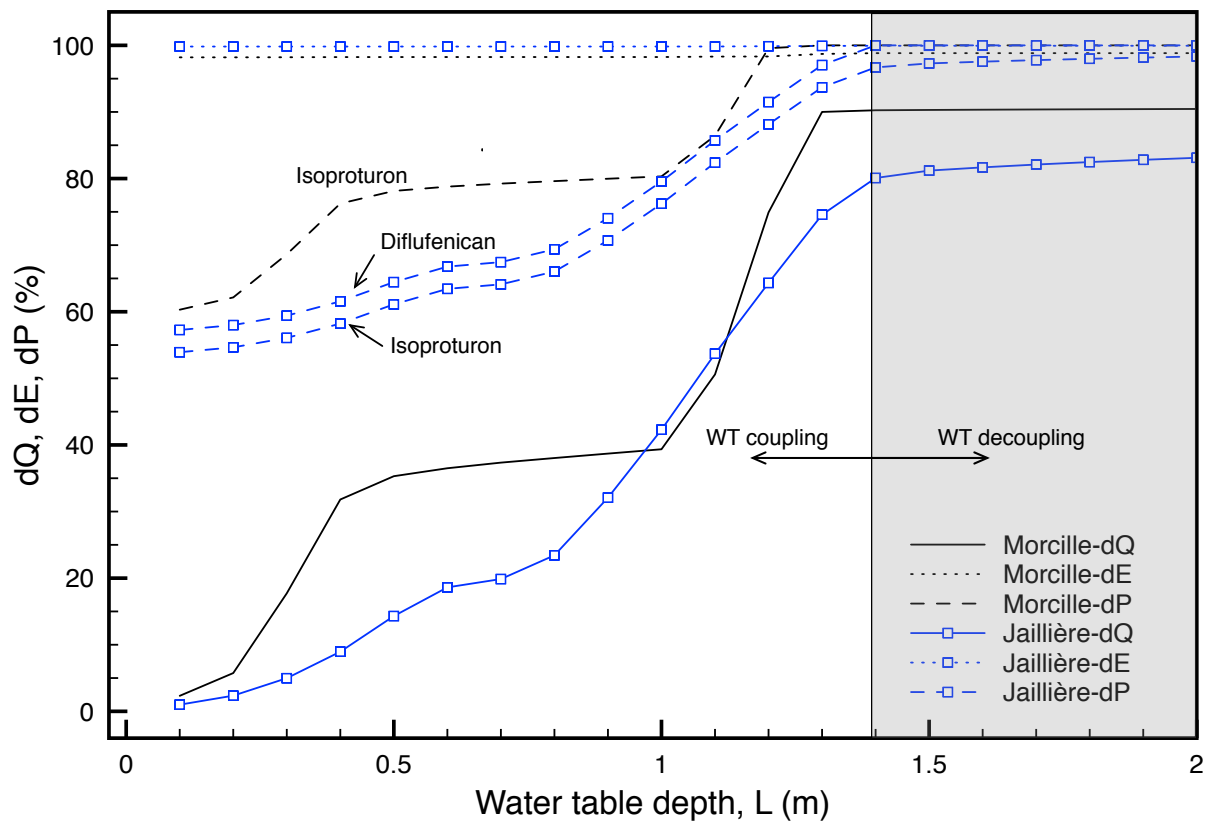

FIG. 5

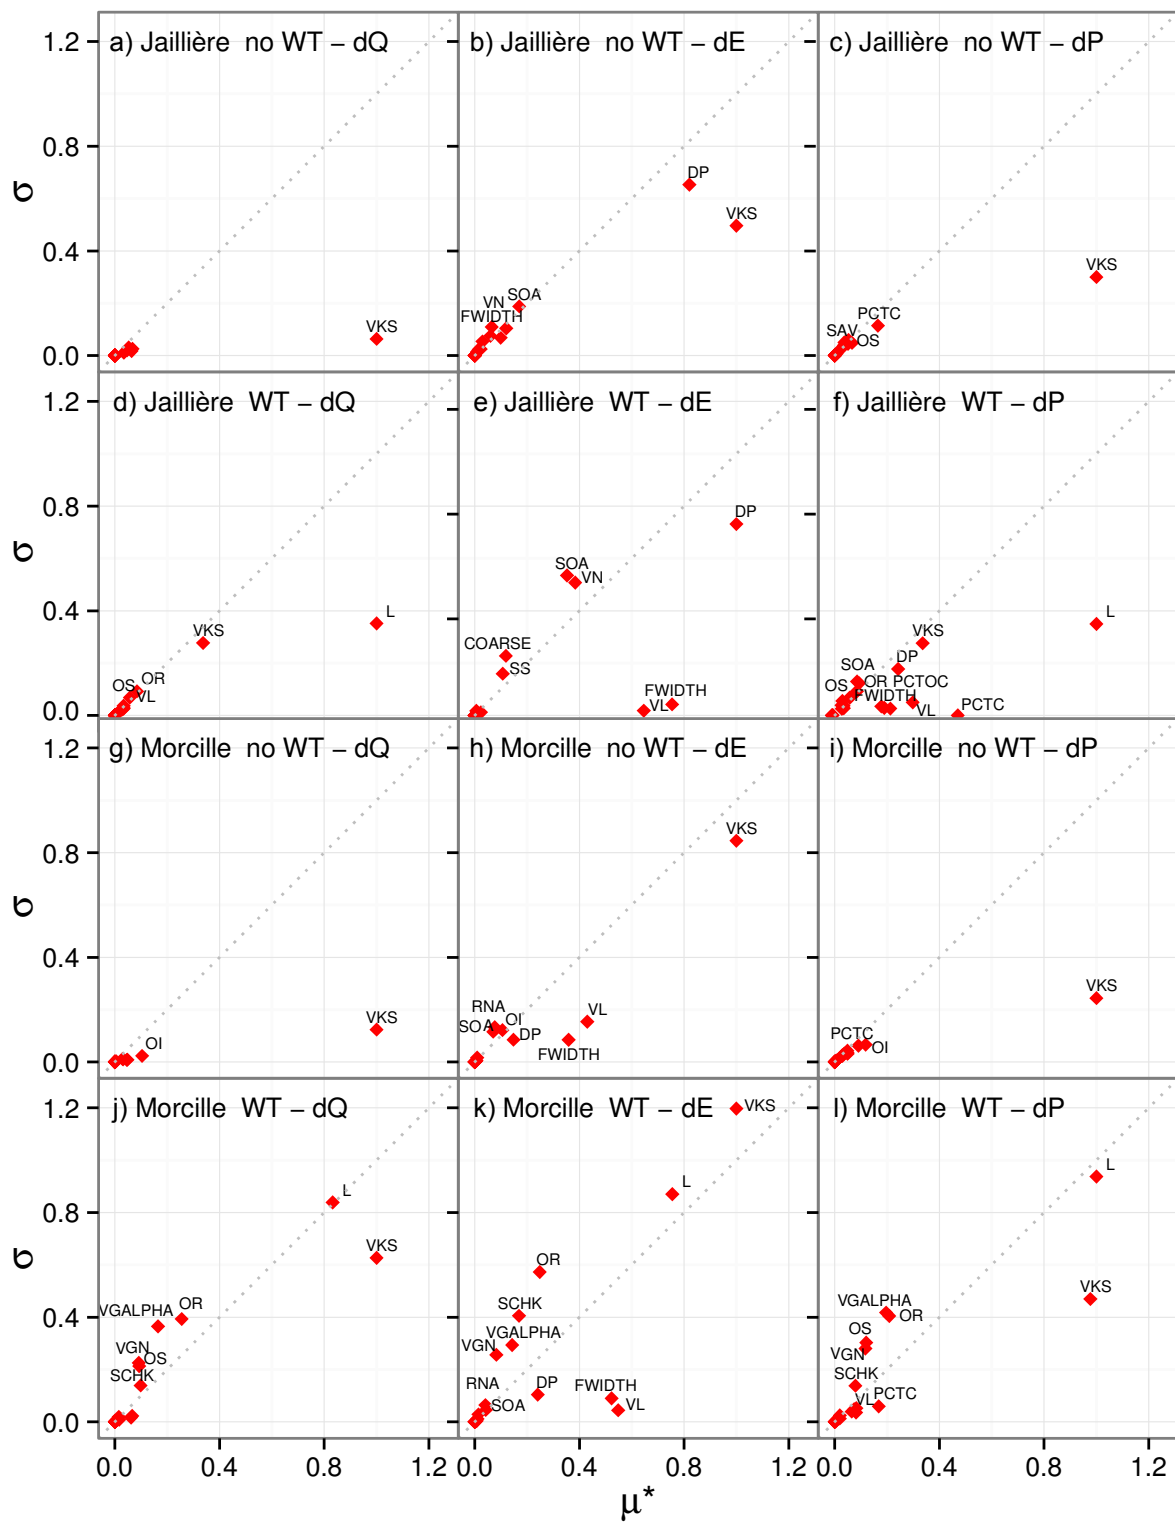

FIG. 6

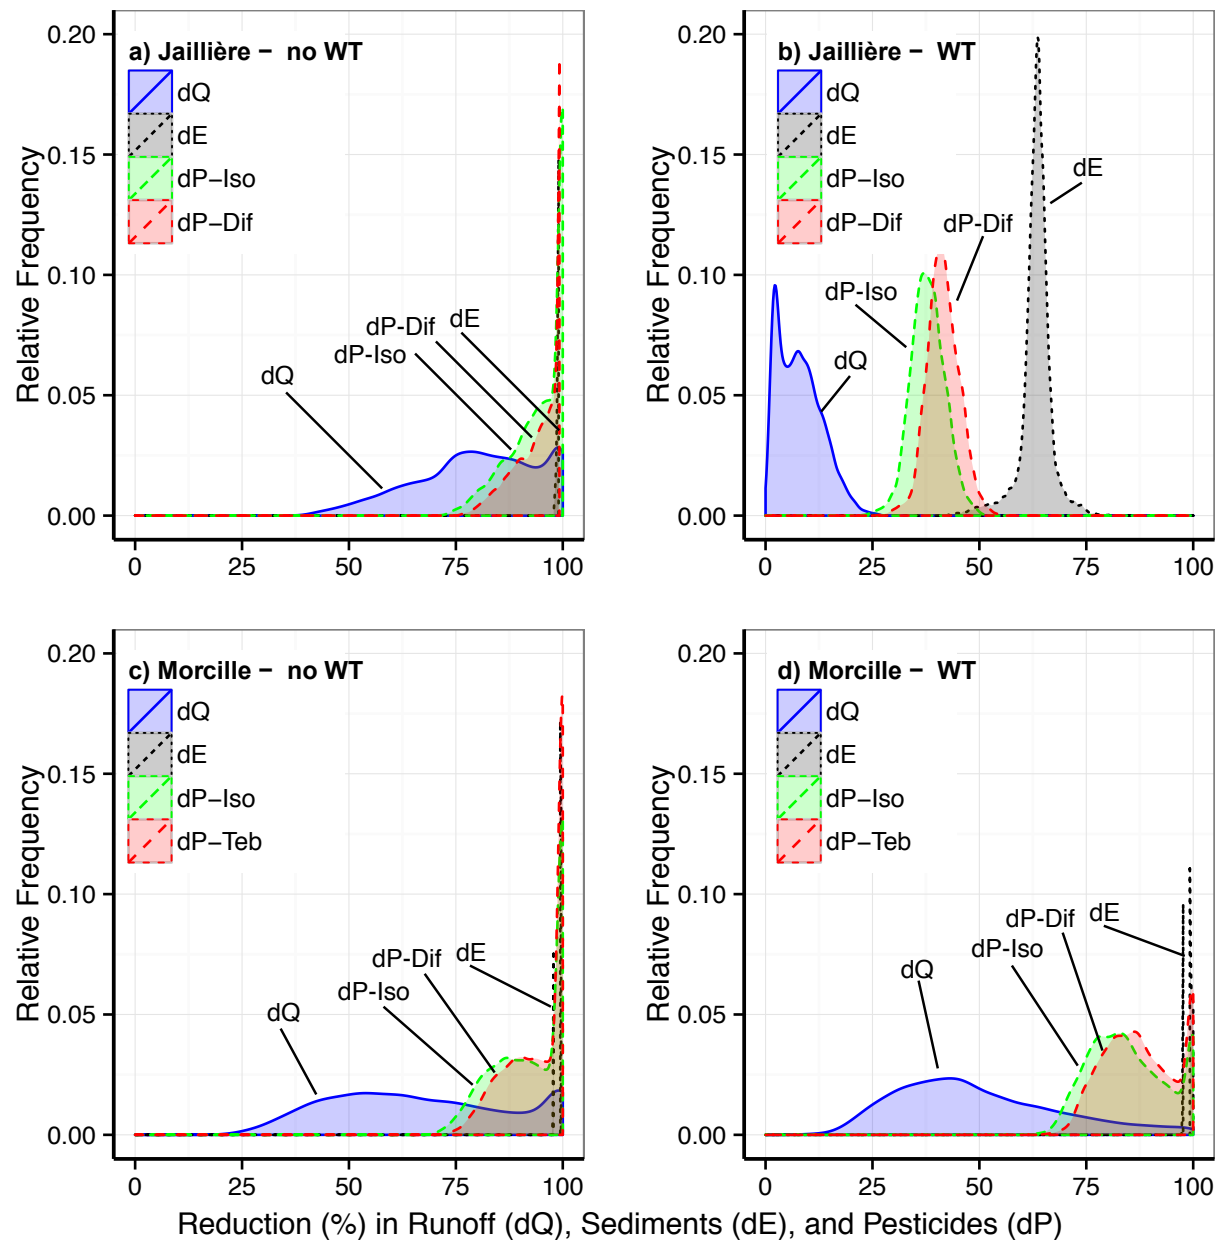

FIG. 7
