# Supplementary material for: Shallow water table effects on water, sediment and pesticidetransport in vegetative filter strips: Part B. model coupling,application, factor importance and uncertainty
Source: Copernicus journal article supplement (doi:10.5194/hess-2017-406), 2017-08-23
Supplement: Supplementary file [file hess-2017-406-AC6-supplement.zip]

## Supplementary materials

### S1. Program distribution.

Free open source code, executable program, documentation and sample applications can be downloaded from the VFSSMOD main web page at <http://abe.ufl.edu/carpenna/vfssmod/>

### S2. Additional Supporting Tables

Table S2.1. Morris indices on Jaillièrè

| Jaillièrè no WT |         |          |         |          |         |          |
|-----------------|---------|----------|---------|----------|---------|----------|
|                 | dQ      | dQ       | dE      | dE       | dP      | dP       |
| Morris Index    | $\mu^*$ | $\sigma$ | $\mu^*$ | $\sigma$ | $\mu^*$ | $\sigma$ |
| FWIDTH          | 3.079   | 1.178    | 0.047   | 0.041    | 0.990   | 1.144    |
| VL              | 2.913   | 0.792    | 0.039   | 0.026    | 1.088   | 0.956    |
| RNA             | 0.023   | 0.017    | 0.007   | 0.010    | 0.009   | 0.012    |
| SOA             | 0.032   | 0.029    | 0.066   | 0.073    | 0.029   | 0.036    |
| VKS             | 45.663  | 2.906    | 0.389   | 0.193    | 21.468  | 6.439    |
| SAV             | 2.406   | 1.399    | 0.009   | 0.010    | 0.789   | 1.076    |
| OS              | 2.114   | 0.897    | 0.011   | 0.021    | 0.761   | 0.830    |
| OI              | 1.558   | 0.492    | 0.004   | 0.006    | 0.506   | 0.547    |
| SS              | 0.000   | 0.000    | 0.005   | 0.008    | 0.002   | 0.004    |
| VN              | 0.000   | 0.000    | 0.025   | 0.043    | 0.010   | 0.022    |
| VN2             | 0.000   | 0.000    | 0.000   | 0.000    | 0.000   | 0.000    |
| SCHK            | 0.002   | 0.003    | 0.000   | 0.001    | 0.000   | 0.001    |
| COARSE          | 0.000   | 0.000    | 0.023   | 0.029    | 0.011   | 0.016    |
| DP              | 0.000   | 0.000    | 0.319   | 0.254    | 0.146   | 0.151    |
| H               | 0.000   | 0.000    | 0.000   | 0.000    | 0.000   | 0.000    |
| KOC             | 0.000   | 0.000    | 0.000   | 0.000    | 1.421   | 1.033    |
| PCTOC           | 0.000   | 0.000    | 0.000   | 0.000    | 1.141   | 1.267    |
| PCTC            | 0.000   | 0.000    | 0.000   | 0.000    | 3.551   | 2.451    |
| Jaillièrè WT    |         |          |         |          |         |          |
|                 | dQ      | dQ       | dE      | dE       | dP      | dP       |
| Morris Index    | $\mu^*$ | $\sigma$ | $\mu^*$ | $\sigma$ | $\mu^*$ | $\sigma$ |
| FWIDTH          | 0.572   | 0.439    | 3.714   | 0.206    | 2.241   | 0.274    |
| VL              | 0.635   | 0.570    | 3.181   | 0.088    | 1.997   | 0.304    |
| RNA             | 0.047   | 0.028    | 0.014   | 0.009    | 0.026   | 0.013    |

|         |        |       |       |       |        |       |
|---------|--------|-------|-------|-------|--------|-------|
| SOA     | 0.030  | 0.021 | 1.736 | 2.634 | 0.897  | 1.369 |
| VKS     | 6.552  | 5.380 | 0.042 | 0.049 | 3.550  | 2.909 |
| WTD     | 19.444 | 6.835 | 0.114 | 0.059 | 10.559 | 3.694 |
| OS      | 1.115  | 1.318 | 0.002 | 0.003 | 0.603  | 0.712 |
| OR      | 1.645  | 1.788 | 0.005 | 0.011 | 0.891  | 0.969 |
| VGALPHA | 0.652  | 0.724 | 0.001 | 0.002 | 0.353  | 0.392 |
| VGN     | 0.522  | 0.491 | 0.002 | 0.004 | 0.283  | 0.268 |
| SS      | 0.000  | 0.000 | 0.526 | 0.785 | 0.274  | 0.408 |
| VN      | 0.000  | 0.000 | 1.890 | 2.500 | 0.983  | 1.300 |
| VN2     | 0.000  | 0.000 | 0.000 | 0.000 | 0.000  | 0.000 |
| SCHK    | 0.651  | 0.512 | 0.029 | 0.087 | 0.367  | 0.288 |
| COARSE  | 0.000  | 0.000 | 0.584 | 1.121 | 0.304  | 0.583 |
| DP      | 0.000  | 0.000 | 4.924 | 3.601 | 2.560  | 1.873 |
| H       | 0.000  | 0.000 | 0.000 | 0.000 | 0.000  | 0.000 |
| KOC     | 0.000  | 0.000 | 0.000 | 0.000 | 1.885  | 0.363 |
| PCTOC   | 0.000  | 0.000 | 0.000 | 0.000 | 3.149  | 0.524 |
| PCTC    | 0.000  | 0.000 | 0.000 | 0.000 | 5.073  | 0.001 |

---

**Table S2.2. Morris indices on Morcille**

| <b>Morcille no WT</b> |         |          |         |          |         |          |
|-----------------------|---------|----------|---------|----------|---------|----------|
|                       | dQ      | dQ       | dE      | dE       | dP      | dP       |
| Morris Index          | $\mu^*$ | $\sigma$ | $\mu^*$ | $\sigma$ | $\mu^*$ | $\sigma$ |
| FWIDTH                | 2.914   | 0.741    | 0.358   | 0.062    | 1.559   | 0.674    |
| VL                    | 3.134   | 1.072    | 0.376   | 0.030    | 1.420   | 0.908    |
| RNA                   | 0.764   | 0.370    | 0.028   | 0.044    | 0.363   | 0.237    |
| SOA                   | 0.705   | 0.901    | 0.029   | 0.031    | 0.380   | 0.467    |
| VKS                   | 47.304  | 29.655   | 0.685   | 0.820    | 18.610  | 8.938    |
| WTD                   | 39.390  | 39.660   | 0.517   | 0.596    | 19.045  | 17.855   |
| OS                    | 4.321   | 10.657   | 0.009   | 0.019    | 2.295   | 5.775    |
| OR                    | 12.075  | 18.595   | 0.170   | 0.393    | 3.962   | 7.708    |
| ALPHAVG               | 7.807   | 17.262   | 0.098   | 0.201    | 3.738   | 7.950    |
| NVG                   | 4.392   | 10.079   | 0.057   | 0.176    | 2.237   | 5.338    |
| SS                    | 0.000   | 0.000    | 0.004   | 0.002    | 0.002   | 0.001    |
| VN                    | 0.000   | 0.000    | 0.004   | 0.003    | 0.001   | 0.002    |
| VN2                   | 0.000   | 0.000    | 0.000   | 0.000    | 0.000   | 0.000    |
| SCHK                  | 4.657   | 6.574    | 0.116   | 0.278    | 1.503   | 2.625    |
| COARSE                | 0.000   | 0.000    | 0.007   | 0.008    | 0.003   | 0.004    |
| DP                    | 0.000   | 0.000    | 0.165   | 0.071    | 0.086   | 0.037    |
| H                     | 0.000   | 0.000    | 0.000   | 0.000    | 0.000   | 0.000    |
| KOC                   | 0.000   | 0.000    | 0.000   | 0.000    | 1.566   | 0.995    |
| PCTOC                 | 0.000   | 0.000    | 0.000   | 0.000    | 1.239   | 0.743    |
| PCTC                  | 0.000   | 0.000    | 0.000   | 0.000    | 3.204   | 1.126    |
| <b>Morcille WT</b>    |         |          |         |          |         |          |
| dQ                    | dQ      | dE       | dE      | dP       | dP      | dP       |
| Morris Index          | $\mu^*$ | $\sigma$ | $\mu^*$ | $\sigma$ | $\mu^*$ | $\sigma$ |
| FWIDTH                | 3.336   | 0.607    | 0.352   | 0.083    | 1.355   | 0.858    |
| VL                    | 3.192   | 0.554    | 0.423   | 0.151    | 1.357   | 0.954    |
| RNA                   | 0.377   | 0.178    | 0.075   | 0.130    | 0.153   | 0.140    |
| SOA                   | 0.112   | 0.099    | 0.104   | 0.120    | 0.047   | 0.065    |
| VKS                   | 69.857  | 8.649    | 0.982   | 0.830    | 27.581  | 6.729    |
| SAV                   | 2.011   | 0.816    | 0.005   | 0.005    | 0.820   | 0.648    |
| OS                    | 2.166   | 0.683    | 0.009   | 0.016    | 0.792   | 0.707    |
| OI                    | 7.275   | 1.610    | 0.069   | 0.114    | 3.266   | 1.820    |

|        |       |       |       |       |       |       |
|--------|-------|-------|-------|-------|-------|-------|
| SS     | 0.000 | 0.000 | 0.003 | 0.002 | 0.002 | 0.001 |
| VN     | 0.000 | 0.000 | 0.006 | 0.005 | 0.003 | 0.003 |
| VN2    | 0.000 | 0.000 | 0.000 | 0.000 | 0.000 | 0.000 |
| SCHK   | 0.000 | 0.001 | 0.000 | 0.000 | 0.000 | 0.000 |
| COARSE | 0.000 | 0.000 | 0.003 | 0.001 | 0.001 | 0.001 |
| DP     | 0.000 | 0.000 | 0.146 | 0.084 | 0.059 | 0.056 |
| H      | 0.000 | 0.000 | 0.000 | 0.000 | 0.000 | 0.000 |
| KOC    | 0.000 | 0.000 | 0.000 | 0.000 | 1.327 | 1.177 |
| PCTOC  | 0.000 | 0.000 | 0.000 | 0.000 | 0.997 | 0.865 |
| PCTC   | 0.000 | 0.000 | 0.000 | 0.000 | 2.492 | 1.720 |

---

**Table S2.3. eFAST indices on Jaillière**

| S <sub>i</sub>    |       |       |       | S <sub>Ti</sub> |       |       | S <sub>Ti</sub> - S <sub>i</sub> |       |       |
|-------------------|-------|-------|-------|-----------------|-------|-------|----------------------------------|-------|-------|
| Inputs            | dQ    | dE    | dP    | dQ              | dE    | dP    | dQ                               | dE    | dP    |
| Jaillière – no WT |       |       |       |                 |       |       |                                  |       |       |
| FWIDTH            | 0.004 | 0.010 | 0.003 | 0.012           | 0.126 | 0.014 | 0.007                            | 0.116 | 0.011 |
| VL                | 0.003 | 0.008 | 0.003 | 0.011           | 0.126 | 0.014 | 0.008                            | 0.118 | 0.011 |
| RNA               | 0.000 | 0.001 | 0.000 | 0.007           | 0.109 | 0.009 | 0.007                            | 0.108 | 0.009 |
| SOA               | 0.000 | 0.007 | 0.000 | 0.008           | 0.107 | 0.010 | 0.008                            | 0.101 | 0.010 |
| VKS               | 0.963 | 0.330 | 0.903 | 0.980           | 0.568 | 0.942 | 0.017                            | 0.239 | 0.040 |
| SAV               | 0.003 | 0.001 | 0.003 | 0.012           | 0.096 | 0.017 | 0.009                            | 0.095 | 0.014 |
| OS                | 0.003 | 0.002 | 0.003 | 0.012           | 0.114 | 0.016 | 0.009                            | 0.112 | 0.014 |
| OI                | 0.001 | 0.001 | 0.001 | 0.009           | 0.112 | 0.014 | 0.008                            | 0.111 | 0.012 |
| SS                | 0.000 | 0.000 | 0.000 | 0.008           | 0.101 | 0.012 | 0.008                            | 0.101 | 0.012 |
| VN                | 0.000 | 0.004 | 0.000 | 0.009           | 0.117 | 0.013 | 0.009                            | 0.113 | 0.013 |
| VN2               | 0.000 | 0.000 | 0.000 | 0.008           | 0.102 | 0.011 | 0.008                            | 0.102 | 0.011 |
| SCHK              | 0.000 | 0.000 | 0.000 | 0.008           | 0.101 | 0.012 | 0.008                            | 0.100 | 0.012 |
| COARSE            | 0.000 | 0.001 | 0.000 | 0.008           | 0.098 | 0.010 | 0.008                            | 0.097 | 0.010 |
| DP                | 0.000 | 0.363 | 0.000 | 0.008           | 0.632 | 0.012 | 0.008                            | 0.269 | 0.012 |
| H                 | 0.000 | 0.000 | 0.000 | 0.009           | 0.160 | 0.014 | 0.009                            | 0.160 | 0.014 |
| KOC               | 0.000 | 0.000 | 0.005 | 0.008           | 0.154 | 0.020 | 0.008                            | 0.154 | 0.015 |
| PCTOC             | 0.000 | 0.000 | 0.008 | 0.009           | 0.152 | 0.024 | 0.009                            | 0.151 | 0.016 |
| PCTC              | 0.000 | 0.000 | 0.024 | 0.009           | 0.110 | 0.047 | 0.009                            | 0.110 | 0.023 |
| ΣS <sub>i</sub> = | 0.977 | 0.728 | 0.953 |                 |       |       |                                  |       |       |
| Jaillière – WT    |       |       |       |                 |       |       |                                  |       |       |
| FWIDTH            | 0.002 | 0.132 | 0.053 | 0.015           | 0.140 | 0.065 | 0.013                            | 0.009 | 0.013 |
| VL                | 0.001 | 0.064 | 0.044 | 0.013           | 0.072 | 0.060 | 0.012                            | 0.008 | 0.017 |
| RNA               | 0.000 | 0.000 | 0.000 | 0.012           | 0.008 | 0.007 | 0.012                            | 0.008 | 0.007 |
| SOA               | 0.000 | 0.037 | 0.014 | 0.011           | 0.137 | 0.061 | 0.011                            | 0.100 | 0.046 |
| VKS               | 0.057 | 0.000 | 0.022 | 0.203           | 0.008 | 0.080 | 0.145                            | 0.008 | 0.058 |
| L                 | 0.764 | 0.000 | 0.417 | 0.907           | 0.008 | 0.496 | 0.143                            | 0.008 | 0.080 |
| OS                | 0.008 | 0.000 | 0.003 | 0.025           | 0.004 | 0.012 | 0.016                            | 0.004 | 0.009 |
| OR                | 0.005 | 0.000 | 0.002 | 0.024           | 0.006 | 0.013 | 0.019                            | 0.006 | 0.011 |
| VGALPHA           | 0.002 | 0.000 | 0.001 | 0.019           | 0.005 | 0.011 | 0.017                            | 0.005 | 0.010 |
| VGN               | 0.005 | 0.000 | 0.003 | 0.022           | 0.006 | 0.015 | 0.017                            | 0.006 | 0.013 |
| SS                | 0.000 | 0.002 | 0.001 | 0.013           | 0.010 | 0.010 | 0.013                            | 0.008 | 0.009 |
| VN                | 0.000 | 0.005 | 0.002 | 0.014           | 0.031 | 0.021 | 0.014                            | 0.026 | 0.019 |
| VN2               | 0.000 | 0.000 | 0.000 | 0.014           | 0.010 | 0.012 | 0.014                            | 0.010 | 0.012 |

|                |       |       |       |       |       |       |       |       |       |
|----------------|-------|-------|-------|-------|-------|-------|-------|-------|-------|
| SCHK           | 0.002 | 0.000 | 0.001 | 0.015 | 0.006 | 0.011 | 0.013 | 0.006 | 0.010 |
| COARSE         | 0.000 | 0.001 | 0.000 | 0.013 | 0.011 | 0.011 | 0.013 | 0.010 | 0.011 |
| DP             | 0.000 | 0.569 | 0.123 | 0.014 | 0.824 | 0.185 | 0.014 | 0.255 | 0.062 |
| H              | 0.000 | 0.000 | 0.000 | 0.014 | 0.020 | 0.010 | 0.014 | 0.020 | 0.010 |
| KOC            | 0.000 | 0.000 | 0.028 | 0.014 | 0.031 | 0.045 | 0.013 | 0.030 | 0.017 |
| PCTOC          | 0.000 | 0.000 | 0.036 | 0.012 | 0.025 | 0.045 | 0.011 | 0.024 | 0.009 |
| PCTC           | 0.000 | 0.000 | 0.114 | 0.014 | 0.021 | 0.125 | 0.014 | 0.020 | 0.011 |
| $\Sigma S_i =$ | 0.846 | 0.81  | 0.864 |       |       |       |       |       |       |

---

Table S2.4. eFAST indices on Morcille

| $S_i$                   |       |       |       | $S_{Ti}$ |       |       | $S_{Ti} - S_i$ |       |       |
|-------------------------|-------|-------|-------|----------|-------|-------|----------------|-------|-------|
| Inputs                  | dQ    | dE    | dP    | dQ       | dE    | dP    | dQ             | dE    | dP    |
| <b>Morcille – no WT</b> |       |       |       |          |       |       |                |       |       |
| FWIDTH                  | 0.002 | 0.033 | 0.002 | 0.006    | 0.047 | 0.009 | 0.004          | 0.014 | 0.007 |
| VL                      | 0.003 | 0.038 | 0.003 | 0.007    | 0.053 | 0.010 | 0.005          | 0.014 | 0.007 |
| RNA                     | 0.000 | 0.000 | 0.000 | 0.004    | 0.012 | 0.006 | 0.004          | 0.012 | 0.005 |
| SOA                     | 0.000 | 0.000 | 0.000 | 0.004    | 0.012 | 0.006 | 0.004          | 0.012 | 0.006 |
| VKS                     | 0.974 | 0.880 | 0.946 | 0.981    | 0.921 | 0.969 | 0.007          | 0.041 | 0.023 |
| SAV                     | 0.001 | 0.000 | 0.001 | 0.005    | 0.015 | 0.008 | 0.005          | 0.015 | 0.008 |
| OS                      | 0.001 | 0.000 | 0.002 | 0.006    | 0.016 | 0.010 | 0.005          | 0.016 | 0.008 |
| OI                      | 0.009 | 0.001 | 0.011 | 0.014    | 0.015 | 0.023 | 0.006          | 0.014 | 0.012 |
| SS                      | 0.000 | 0.000 | 0.000 | 0.004    | 0.015 | 0.007 | 0.004          | 0.015 | 0.007 |
| VN                      | 0.000 | 0.000 | 0.000 | 0.005    | 0.013 | 0.008 | 0.005          | 0.013 | 0.008 |
| VN2                     | 0.000 | 0.000 | 0.000 | 0.004    | 0.015 | 0.007 | 0.004          | 0.015 | 0.007 |
| SCHK                    | 0.000 | 0.000 | 0.000 | 0.004    | 0.016 | 0.007 | 0.004          | 0.016 | 0.007 |
| COARSE                  | 0.000 | 0.000 | 0.000 | 0.004    | 0.014 | 0.006 | 0.004          | 0.014 | 0.006 |
| DP                      | 0.000 | 0.010 | 0.000 | 0.004    | 0.026 | 0.007 | 0.004          | 0.016 | 0.007 |
| H                       | 0.000 | 0.000 | 0.000 | 0.004    | 0.017 | 0.008 | 0.004          | 0.017 | 0.008 |
| KOC                     | 0.000 | 0.000 | 0.004 | 0.004    | 0.015 | 0.013 | 0.004          | 0.015 | 0.009 |
| PCTOC                   | 0.000 | 0.000 | 0.002 | 0.004    | 0.016 | 0.010 | 0.004          | 0.016 | 0.008 |
| PCTC                    | 0.000 | 0.000 | 0.007 | 0.004    | 0.015 | 0.018 | 0.004          | 0.015 | 0.011 |
| $\Sigma S_i =$          | 0.99  | 0.962 | 0.976 |          |       |       |                |       |       |
| <b>Morcille – WT</b>    |       |       |       |          |       |       |                |       |       |
| FWIDTH                  | 0.003 | 0.094 | 0.003 | 0.064    | 0.222 | 0.053 | 0.061          | 0.128 | 0.050 |
| VL                      | 0.003 | 0.124 | 0.002 | 0.057    | 0.251 | 0.045 | 0.054          | 0.127 | 0.042 |
| RNA                     | 0.001 | 0.001 | 0.001 | 0.059    | 0.195 | 0.044 | 0.059          | 0.193 | 0.043 |
| SOA                     | 0.000 | 0.003 | 0.001 | 0.051    | 0.111 | 0.046 | 0.050          | 0.108 | 0.045 |
| VKS                     | 0.248 | 0.080 | 0.258 | 0.556    | 0.491 | 0.534 | 0.308          | 0.411 | 0.275 |
| L                       | 0.412 | 0.205 | 0.475 | 0.708    | 0.519 | 0.758 | 0.296          | 0.314 | 0.283 |
| OS                      | 0.005 | 0.008 | 0.004 | 0.084    | 0.218 | 0.065 | 0.078          | 0.209 | 0.061 |
| OR                      | 0.005 | 0.009 | 0.004 | 0.077    | 0.185 | 0.054 | 0.072          | 0.176 | 0.050 |
| VGALPHA                 | 0.004 | 0.007 | 0.004 | 0.078    | 0.162 | 0.059 | 0.074          | 0.155 | 0.056 |
| VGN                     | 0.003 | 0.004 | 0.002 | 0.078    | 0.168 | 0.049 | 0.075          | 0.165 | 0.047 |
| SS                      | 0.000 | 0.002 | 0.000 | 0.068    | 0.099 | 0.053 | 0.067          | 0.097 | 0.053 |
| VN                      | 0.000 | 0.001 | 0.000 | 0.067    | 0.141 | 0.052 | 0.066          | 0.141 | 0.052 |
| VN2                     | 0.002 | 0.002 | 0.001 | 0.064    | 0.111 | 0.043 | 0.062          | 0.109 | 0.042 |

|                |       |       |       |       |       |       |       |       |       |
|----------------|-------|-------|-------|-------|-------|-------|-------|-------|-------|
| SCHK           | 0.004 | 0.006 | 0.002 | 0.064 | 0.128 | 0.052 | 0.061 | 0.122 | 0.050 |
| COARSE         | 0.000 | 0.001 | 0.000 | 0.073 | 0.101 | 0.056 | 0.073 | 0.100 | 0.056 |
| DP             | 0.001 | 0.088 | 0.001 | 0.052 | 0.195 | 0.042 | 0.051 | 0.107 | 0.041 |
| H              | 0.000 | 0.002 | 0.000 | 0.053 | 0.084 | 0.043 | 0.052 | 0.082 | 0.043 |
| KOC            | 0.001 | 0.003 | 0.005 | 0.069 | 0.178 | 0.060 | 0.068 | 0.175 | 0.055 |
| PCTOC          | 0.000 | 0.002 | 0.004 | 0.080 | 0.126 | 0.076 | 0.080 | 0.124 | 0.073 |
| PCTC           | 0.001 | 0.001 | 0.010 | 0.078 | 0.198 | 0.072 | 0.078 | 0.197 | 0.062 |
| $\Sigma S_i =$ | 0.693 | 0.643 | 0.777 |       |       |       |       |       |       |



**Table S2.5. Uncertainty analysis statistics for selected output probability distributions obtained from eFAST results.<sup>[a]</sup>**

| Output <sup>[b]</sup> | Site      | Components | Range | Mean | Median | 95% CI    | SD   | SE    | Min. | Q1   | Q3   | Max. | Skew   | Kurtosis |
|-----------------------|-----------|------------|-------|------|--------|-----------|------|-------|------|------|------|------|--------|----------|
| dQ                    | Jaillière | No WT      | 63.1  | 80.1 | 81     | 79.8-80.4 | 14.1 | 0.15  | 36.9 | 71   | 91.6 | 100  | -0.44  | 2.45     |
|                       |           | WT         | 29.1  | 7.9  | 7.4    | 7.8-8.1   | 5.1  | 0.051 | -2.1 | 3.4  | 11.4 | 27   | 0.58   | 2.74     |
|                       | Morcille  | No WT      | 79.8  | 66.8 | 64.6   | 66.3 67.2 | 20.7 | 0.219 | 20.1 | 50.1 | 83.6 | 100  | 0.12   | 1.92     |
|                       |           | WT         | 91.9  | 49.5 | 46.1   | 49.2 49.9 | 18.8 | 0.189 | 8.1  | 35.4 | 61.2 | 100  | 0.65   | 2.84     |
| dE                    | Jaillière | No WT      | 1.95  | 99.8 | 99.9   | 99.8 99.8 | 0.19 | 0.002 | 98   | 99.8 | 99.9 | 100  | -2.69  | 14.1     |
|                       |           | WT         | 41    | 63.3 | 63.5   | 63.2 63.4 | 3.77 | 0.038 | 42.8 | 62.0 | 64.9 | 83.9 | -0.87  | 8.28     |
|                       | Morcille  | No WT      | 2.2   | 98.7 | 98.5   | 98.7 98.7 | 0.52 | 0.005 | 97.8 | 98.3 | 98.7 | 100  | 1.48   | 4.28     |
|                       |           | WT         | 2.5   | 98.4 | 98.4   | 98.4 98.4 | 0.31 | 0.003 | 97.5 | 98.2 | 98.5 | 100  | 1.65   | 9.11     |
| dP-<br>Iso.           | Jaillière | No WT      | 29.9  | 94.4 | 96.5   | 94.3 94.6 | 6.28 | 0.066 | 70.1 | 90.6 | 100  | 100  | -1.05  | 3.22     |
|                       |           | WT         | 29.3  | 37.9 | 37.8   | 37.9 38.0 | 3.98 | 0.039 | 22.7 | 35.3 | 40.5 | 52   | 0.022  | 3.26     |
|                       | Morcille  | No WT      | 31.1  | 92.2 | 94     | 92.1 92.4 | 7.86 | 0.083 | 68.8 | 86   | 100  | 100  | -0.604 | 2.13     |
|                       |           | WT         | 38.3  | 85   | 83.9   | 84.9 85.2 | 9    | 0.09  | 61.7 | 77.9 | 92   | 100  | 0.191  | 2.047    |
| dP-<br>Dif.           | Jaillière | No WT      | 24.5  | 96.5 | 99.9   | 96.4 96.6 | 5.06 | 0.053 | 75.4 | 94.2 | 100  | 100  | -1.51  | 4.427    |
|                       |           | WT         | 28.2  | 41.5 | 41.3   | 41.4 41.6 | 3.8  | 0.038 | 26.3 | 39.0 | 43.9 | 54.6 | 0.017  | 3.385    |
| dP-<br>Teb.           | Morcille  | No WT      | 28.1  | 94.2 | 97.1   | 94.1 94.4 | 6.71 | 0.071 | 71.9 | 89.1 | 100  | 100  | -0.856 | 2.53     |
|                       |           | WT         | 34.7  | 87.8 | 87.1   | 87.6 87.9 | 8.37 | 0.084 | 65.3 | 81.2 | 95.1 | 100  | 0.0019 | 1.94     |

<sup>[a]</sup> 95% CI = 95% confidence interval (i.e. range of output values between 2.5% and 97.5% cumulative distribution percentiles); SD = standard deviation; SE = standard error of the mean; Q1, Q3 = 1<sup>st</sup> and 3<sup>rd</sup> quartiles of the output probability distribution.

<sup>[b]</sup> dQ. dE. dP: VFS reductions of flow sediment and pesticide; Pesticides are Isoproturon (Iso). Diflufenican (Dif), Tebuconazole (Teb).

### S3. Additional Supporting Figure

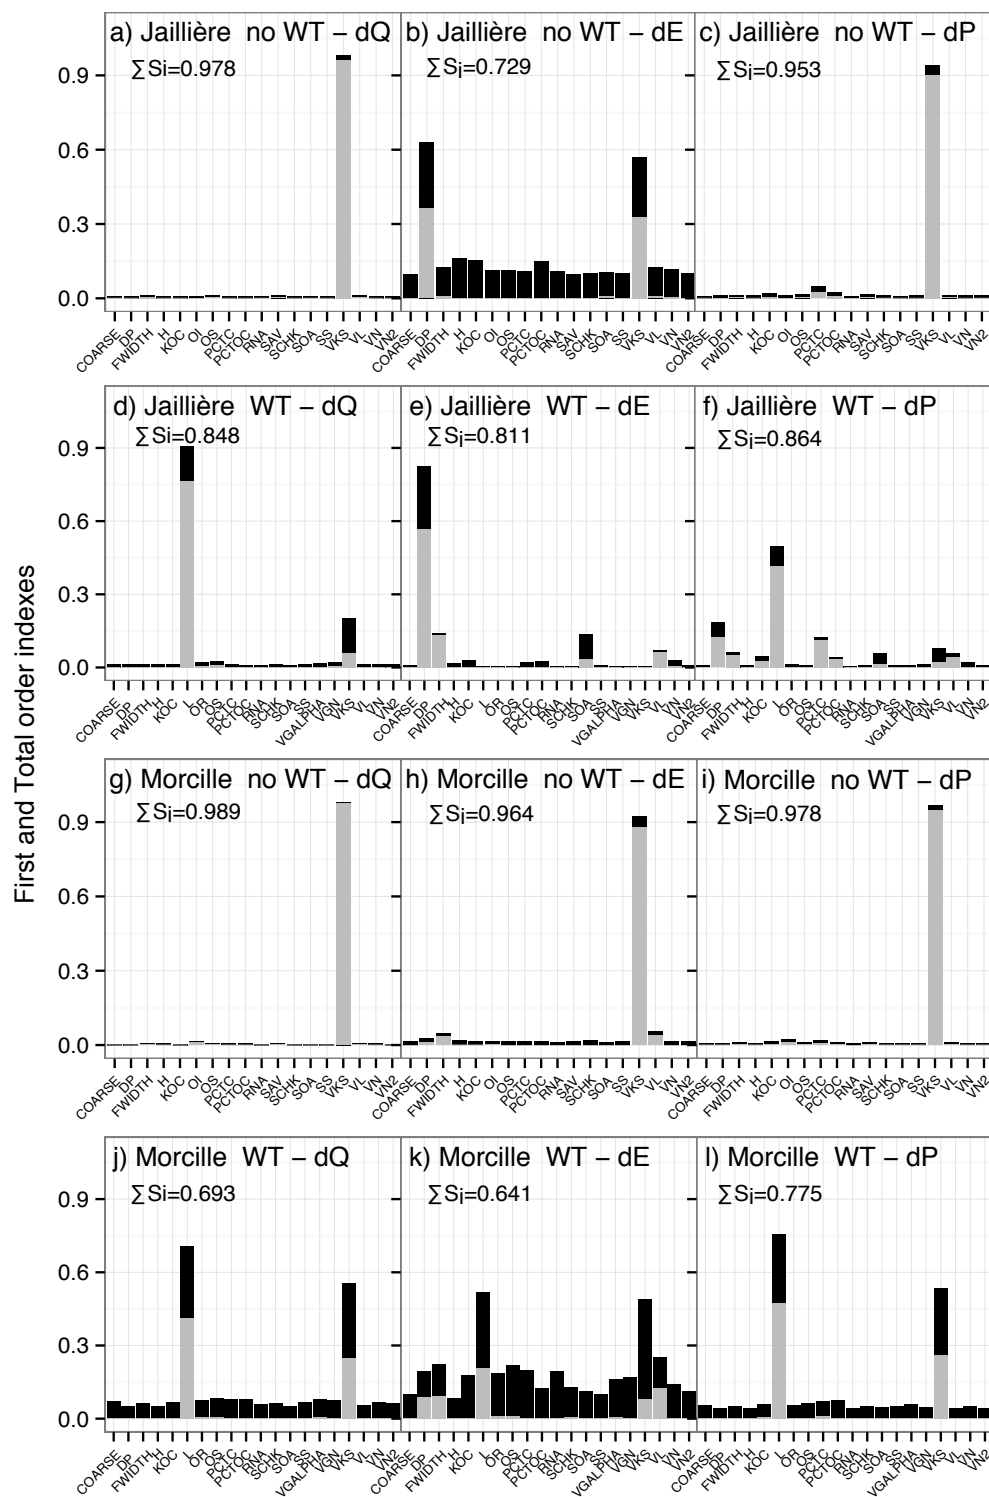

**Figure S1: Global sensitivity analysis eFAST results for dQ (reduction of surface water), dE (reduction of sediment) and dP (reduction of pesticide Isoproturon) outputs on the Jaillière (a-f) and Morcille (g-l) sites, without water table (no WT) and with water table (WT). Grey and black bars represent indices for first order ( $S_i$ ) and interactions ( $S_{Ti} - S_i$ ).**

#### S4. FitEval Evaluation Files

The FitEval framework and software is described in Ritter and Muñoz-Carpena (2013). For additional details of the files and options presented below please visit the software page at <http://abe.ufl.edu/carpena/software/FITEVAL.shtml>

##### A. Configuration options (file fitevalconfig.txt)

```
0.65 %Acceptable NSE threshold value
0.80 %Good NSE threshold value
0.90 %Very good NSE threshold value
5    %BiasValue
0    %Compute Legates and McCabe modified NSE (1=yes,0=no)
0    % Bootstrap method (1= Efrons' bootstrapping, 0= block bootstrapping)
9    % FontSizeValue
1    % Do not display graphical output (1=accept)
1    % Take into account observations & model uncertainty (>0,1,2,3,4= yes)
bd   % Color and type of marker size
5    % Sizes of the series marker
```

##### B. Input file

| predicted, $P_i$ | Observed, $O_i$ | lower 95CI $P_i$ | upper 95CI $P_i$ |
|------------------|-----------------|------------------|------------------|
| 0.00E+00         | 0.00E+00        | 0.00E+00         | 0.00E+00         |
| 0.00E+00         | 1.30E-05        | 0.00E+00         | 0.00E+00         |
| 0.00E+00         | 1.50E-05        | 0.00E+00         | 0.00E+00         |
| 0.00E+00         | 1.30E-05        | 0.00E+00         | 0.00E+00         |
| 0.00E+00         | 1.20E-05        | 0.00E+00         | 0.00E+00         |
| 0.00E+00         | 1.20E-05        | 0.00E+00         | 0.00E+00         |
| 0.00E+00         | 1.20E-05        | 0.00E+00         | 0.00E+00         |
| 8.82E-06         | 5.00E-06        | 0.00E+00         | 2.50E-05         |
| 2.94E-05         | 1.20E-05        | 0.00E+00         | 8.33E-05         |
| 4.80E-05         | 7.00E-06        | 0.00E+00         | 1.36E-04         |
| 6.76E-05         | 1.30E-05        | 0.00E+00         | 1.92E-04         |
| 6.67E-05         | 1.10E-05        | 0.00E+00         | 2.04E-04         |
| 5.46E-05         | 7.00E-06        | 0.00E+00         | 1.92E-04         |
| 4.18E-05         | 4.00E-06        | 0.00E+00         | 1.79E-04         |
| 2.84E-05         | 1.00E-05        | 0.00E+00         | 1.66E-04         |
| 2.09E-05         | 1.00E-05        | 0.00E+00         | 1.34E-04         |
| 1.41E-05         | 1.00E-05        | 0.00E+00         | 9.66E-05         |
| 6.87E-06         | 6.00E-06        | 0.00E+00         | 5.71E-05         |
| 3.43E-07         | 6.00E-06        | 0.00E+00         | 2.13E-05         |
| 0.00E+00         | 9.00E-06        | 0.00E+00         | 1.46E-05         |
| 0.00E+00         | 2.00E-06        | 0.00E+00         | 9.28E-06         |
| 0.00E+00         | 1.00E-05        | 0.00E+00         | 4.46E-06         |
| 0.00E+00         | 2.00E-06        | 0.00E+00         | 0.00E+00         |
| 0.00E+00         | 6.00E-06        | 0.00E+00         | 0.00E+00         |
| 0.00E+00         | 9.00E-06        | 0.00E+00         | 0.00E+00         |
| 0.00E+00         | 9.00E-06        | 0.00E+00         | 0.00E+00         |
| 0.00E+00         | 9.00E-06        | 0.00E+00         | 0.00E+00         |
| 0.00E+00         | 1.00E-05        | 0.00E+00         | 0.00E+00         |
| 0.00E+00         | 3.00E-06        | 0.00E+00         | 0.00E+00         |
| 0.00E+00         | 6.00E-06        | 0.00E+00         | 0.00E+00         |

[illegible]

|          |          |          |          |
|----------|----------|----------|----------|
| 0.00E+00 | 1.10E-05 | 0.00E+00 | 0.00E+00 |
| 9.02E-06 | 2.00E-06 | 0.00E+00 | 3.02E-05 |
| 2.41E-05 | 9.00E-06 | 0.00E+00 | 8.05E-05 |
| 3.98E-05 | 0.00E+00 | 0.00E+00 | 1.33E-04 |
| 5.41E-05 | 1.10E-05 | 0.00E+00 | 1.81E-04 |
| 1.11E-04 | 1.10E-05 | 2.22E-05 | 2.49E-04 |
| 1.81E-04 | 1.00E-05 | 5.14E-05 | 3.25E-04 |
| 2.45E-04 | 1.10E-05 | 7.78E-05 | 3.93E-04 |
| 3.12E-04 | 1.10E-05 | 1.06E-04 | 4.65E-04 |
| 2.96E-04 | 1.10E-05 | 9.43E-05 | 4.48E-04 |
| 2.78E-04 | 1.00E-05 | 8.22E-05 | 4.28E-04 |
| 2.59E-04 | 7.00E-06 | 6.94E-05 | 4.07E-04 |
| 2.38E-04 | 1.60E-05 | 5.58E-05 | 3.84E-04 |
| 2.16E-04 | 2.30E-05 | 4.17E-05 | 3.61E-04 |
| 1.92E-04 | 4.60E-05 | 2.70E-05 | 3.37E-04 |
| 1.68E-04 | 4.60E-05 | 1.15E-05 | 3.12E-04 |
| 1.45E-04 | 3.70E-05 | 1.73E-06 | 2.89E-04 |
| 1.23E-04 | 5.00E-05 | 1.25E-06 | 2.66E-04 |
| 9.92E-05 | 5.30E-05 | 7.32E-07 | 2.41E-04 |
| 7.78E-05 | 4.50E-05 | 2.69E-07 | 2.19E-04 |
| 5.82E-05 | 5.30E-05 | 0.00E+00 | 1.96E-04 |
| 4.14E-05 | 6.10E-05 | 0.00E+00 | 1.72E-04 |
| 2.62E-05 | 7.70E-05 | 0.00E+00 | 1.50E-04 |
| 1.02E-05 | 5.20E-05 | 0.00E+00 | 1.27E-04 |
| 3.17E-06 | 7.70E-05 | 0.00E+00 | 1.11E-04 |
| 2.21E-06 | 7.40E-05 | 0.00E+00 | 1.01E-04 |
| 1.21E-06 | 7.30E-05 | 0.00E+00 | 9.08E-05 |
| 1.51E-07 | 7.10E-05 | 0.00E+00 | 7.98E-05 |
| 1.49E-05 | 8.00E-05 | 0.00E+00 | 1.12E-04 |
| 3.35E-05 | 1.03E-04 | 0.00E+00 | 1.55E-04 |
| 5.30E-05 | 1.16E-04 | 0.00E+00 | 1.99E-04 |
| 7.07E-05 | 1.33E-04 | 0.00E+00 | 2.40E-04 |
| 1.08E-04 | 1.31E-04 | 4.62E-06 | 2.75E-04 |
| 1.48E-04 | 1.72E-04 | 9.72E-06 | 3.12E-04 |
| 1.84E-04 | 2.15E-04 | 1.43E-05 | 3.45E-04 |
| 2.17E-04 | 2.30E-04 | 1.90E-05 | 3.74E-04 |
| 2.04E-04 | 2.36E-04 | 2.16E-05 | 3.55E-04 |
| 1.93E-04 | 2.73E-04 | 2.39E-05 | 3.38E-04 |
| 1.80E-04 | 2.36E-04 | 2.64E-05 | 3.21E-04 |
| 1.58E-04 | 2.28E-04 | 2.56E-05 | 2.91E-04 |
| 1.19E-04 | 1.88E-04 | 1.86E-05 | 2.46E-04 |
| 7.87E-05 | 1.51E-04 | 1.13E-05 | 1.97E-04 |
| 3.62E-05 | 1.99E-04 | 3.65E-06 | 1.47E-04 |
| 1.41E-05 | 1.16E-04 | 0.00E+00 | 1.10E-04 |
| 9.99E-06 | 9.70E-05 | 0.00E+00 | 8.01E-05 |
| 5.62E-06 | 7.90E-05 | 0.00E+00 | 4.91E-05 |
| 1.66E-06 | 5.80E-05 | 0.00E+00 | 2.11E-05 |
| 0.00E+00 | 3.30E-05 | 0.00E+00 | 7.83E-06 |
| 0.00E+00 | 4.00E-06 | 0.00E+00 | 0.00E+00 |
| 0.00E+00 | 2.00E-06 | 0.00E+00 | 0.00E+00 |
| 0.00E+00 | 9.00E-06 | 0.00E+00 | 0.00E+00 |
| 0.00E+00 | 6.00E-06 | 0.00E+00 | 0.00E+00 |
| 0.00E+00 | 7.00E-06 | 0.00E+00 | 0.00E+00 |
| 0.00E+00 | 3.00E-06 | 0.00E+00 | 0.00E+00 |
| 0.00E+00 | 3.00E-06 | 0.00E+00 | 0.00E+00 |
| 0.00E+00 | 2.00E-06 | 0.00E+00 | 0.00E+00 |
| 0.00E+00 | 1.00E-06 | 0.00E+00 | 0.00E+00 |

|          |          |          |          |
|----------|----------|----------|----------|
| 0.00E+00 | 9.00E-06 | 0.00E+00 | 0.00E+00 |
| 0.00E+00 | 9.00E-06 | 0.00E+00 | 0.00E+00 |
| 0.00E+00 | 6.00E-06 | 0.00E+00 | 0.00E+00 |
| 0.00E+00 | 5.00E-06 | 0.00E+00 | 0.00E+00 |
| 0.00E+00 | 6.00E-06 | 0.00E+00 | 0.00E+00 |
| 0.00E+00 | 3.00E-06 | 0.00E+00 | 0.00E+00 |
| 0.00E+00 | 6.00E-06 | 0.00E+00 | 0.00E+00 |
| 0.00E+00 | 9.00E-06 | 0.00E+00 | 0.00E+00 |
| 0.00E+00 | 7.00E-06 | 0.00E+00 | 0.00E+00 |
| 0.00E+00 | 7.00E-06 | 0.00E+00 | 0.00E+00 |
| 0.00E+00 | 1.10E-05 | 0.00E+00 | 0.00E+00 |
| 0.00E+00 | 8.00E-06 | 0.00E+00 | 0.00E+00 |
| 0.00E+00 | 5.00E-06 | 0.00E+00 | 0.00E+00 |
| 0.00E+00 | 9.00E-06 | 0.00E+00 | 0.00E+00 |
| 0.00E+00 | 4.00E-06 | 0.00E+00 | 0.00E+00 |
| 0.00E+00 | 1.00E-06 | 0.00E+00 | 0.00E+00 |
| 0.00E+00 | 7.00E-06 | 0.00E+00 | 0.00E+00 |
| 0.00E+00 | 3.00E-06 | 0.00E+00 | 0.00E+00 |
| 0.00E+00 | 6.00E-06 | 0.00E+00 | 0.00E+00 |
| 0.00E+00 | 7.00E-06 | 0.00E+00 | 0.00E+00 |
| 0.00E+00 | 8.00E-06 | 0.00E+00 | 0.00E+00 |
| 0.00E+00 | 3.00E-06 | 0.00E+00 | 0.00E+00 |
| 0.00E+00 | 8.00E-06 | 0.00E+00 | 0.00E+00 |
| 0.00E+00 | 6.00E-06 | 0.00E+00 | 0.00E+00 |

### C. Graphical Output File

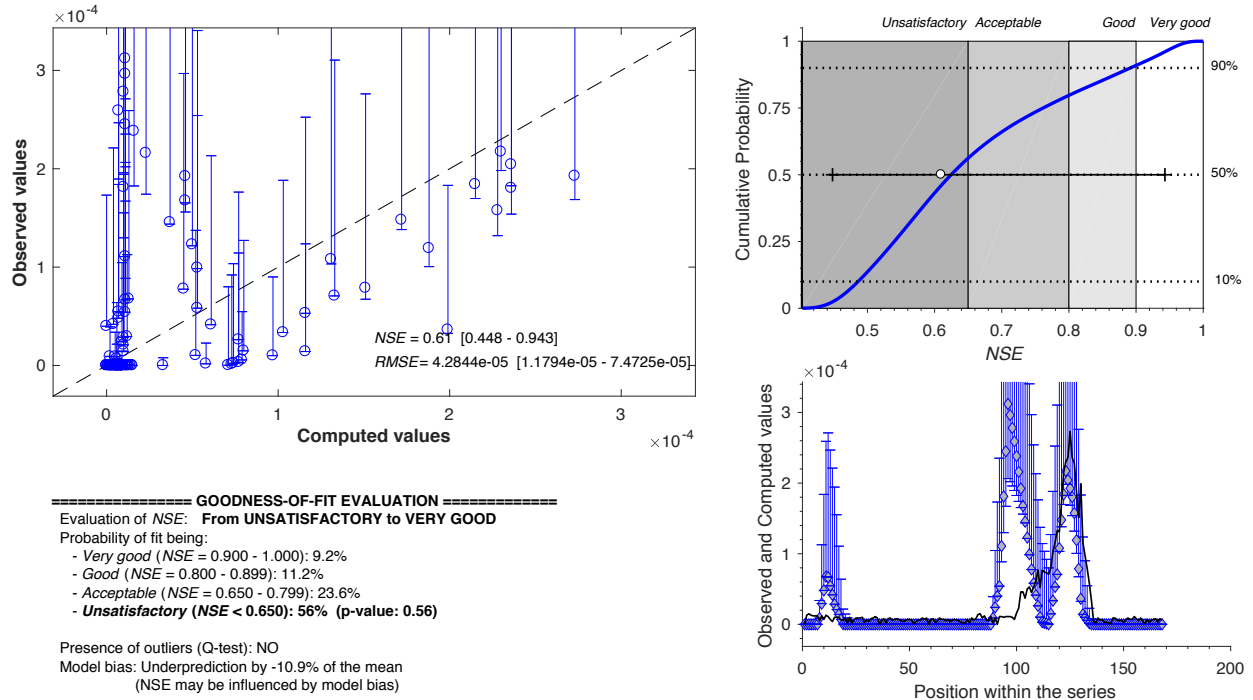

**Figure S2: VFSMOD model goodness-of-fit evaluation for Morcille VFS outflow measurements (Fig. 4a in manuscript). Evaluation with observed data uncertainty based on simulations varying saturated hydraulic conductivity  $K_s$  within the field measured range. Data uncertainty handled based on Probable Error Range, PER (Harmel et al, 2007)**

#### D. Text Output File

```
===== GOODNESS-OF-FIT EVALUATION =====  
RMSE= 4.284e-05 [1.179e-05 - 7.472e-05]*  
NSE = 0.610 [0.448 - 0.943]*
```

Evaluation of NSE: From UNSATISFACTORY to VERY GOOD

Probability of fit being:

- Very good (NSE = 0.900 - 1.000): 9.2%
- Good (NSE = 0.800 - 0.899): 11.2%
- Acceptable (NSE = 0.650 - 0.799): 23.6%
- Unsatisfactory (NSE < 0.650): 56.0% (p-value: 0.560)

Presence of outliers (Q-test): NO

Model bias: Underprediction by -10.9% of the mean  
(NSE may be influenced by model bias)

---

\*: 95% Confidence interval obtained from Bca bootstrapping  
using Politis and Romano (1994) block bootstrap method  
for stationary dependent data.

Uncertainty in observations included (Harmel et al. 2007):  
Lower and upper error specific to each observed value.
